# Supplementary material for: Influence of Immunocastration on Slaughter Traits and Boar Taint Compounds in Pigs Originating from Three Different Terminal Sire Lines
Source: MDPI journal article supplement (doi:10.3390/ani11010228), 2021-01-18
Supplement: s1 [file s1]

Supplementary Materials

# Influence of Immunocastration on Slaughter Traits and Boar Taint Compounds in Pigs Originating from Three Different Terminal Sire Lines

Ivona Djurkin Kušec, Emilija Cimerman, Martin Škrlep, Danijel Karolyi, Kristina Gvozdanović, Miodrag Komlenić, Žarko Radišić and Goran Kušec

**Table S1.** Significant male type x terminal sire line interaction of investigated traits.

| Male type          | Terminal sire line (TSL) | Carcass traits     |                       | Meat quality traits |                    |                      | Androstenone concentration, $\mu\text{g/g}$ |                   |
|--------------------|--------------------------|--------------------|-----------------------|---------------------|--------------------|----------------------|---------------------------------------------|-------------------|
|                    |                          | Carcass length, cm | Ham circumference, cm | pH <sub>45</sub>    | pH <sub>24</sub>   | Drip Loss, % CIE a * |                                             |                   |
| Immunocastrates    | A                        | 90.8 <sup>b</sup>  | 73.65 <sup>c</sup>    | 6.33 <sup>ab</sup>  | 5.49 <sup>b</sup>  | 8.33 <sup>abc</sup>  | 7.64 <sup>ab</sup>                          | 0.22 <sup>b</sup> |
|                    | B                        | 92.0 <sup>b</sup>  | 74.75 <sup>abc</sup>  | 6.30 <sup>ab</sup>  | 5.58 <sup>a</sup>  | 8.39 <sup>abc</sup>  | 7.27 <sup>b</sup>                           | 0.84 <sup>b</sup> |
|                    | C                        | 94.6 <sup>a</sup>  | 75.60 <sup>a</sup>    | 6.06 <sup>c</sup>   | 5.54 <sup>ab</sup> | 8.71 <sup>abc</sup>  | 8.20 <sup>ab</sup>                          | 0.63 <sup>b</sup> |
| Entire males       | A                        | 91.5 <sup>b</sup>  | 73.80 <sup>bc</sup>   | 6.35 <sup>a</sup>   | 5.54 <sup>ab</sup> | 7.44 <sup>bc</sup>   | 8.03 <sup>ab</sup>                          | 0.79 <sup>b</sup> |
|                    | B                        | 92.0 <sup>b</sup>  | 75.25 <sup>a</sup>    | 6.26 <sup>abc</sup> | 5.57 <sup>a</sup>  | 11.03 <sup>a</sup>   | 7.47 <sup>b</sup>                           | 0.53 <sup>b</sup> |
|                    | C                        | 91.3 <sup>b</sup>  | 74.80 <sup>abc</sup>  | 6.08 <sup>c</sup>   | 5.56 <sup>ab</sup> | 8.05 <sup>bc</sup>   | 8.67 <sup>a</sup>                           | 2.27 <sup>a</sup> |
| Surgical castrates | A                        | 92.3 <sup>b</sup>  | 75.00 <sup>ab</sup>   | 6.14 <sup>bc</sup>  | 5.56 <sup>ab</sup> | 7.92 <sup>bc</sup>   | 8.10 <sup>ab</sup>                          |                   |
|                    | B                        | 92.3 <sup>b</sup>  | 75.45 <sup>a</sup>    | 6.27 <sup>abc</sup> | 5.51 <sup>ab</sup> | 8.85 <sup>ab</sup>   | 8.16 <sup>ab</sup>                          |                   |
|                    | C                        | 91.9 <sup>b</sup>  | 75.15 <sup>ab</sup>   | 6.40 <sup>a</sup>   | 5.56 <sup>ab</sup> | 5.93 <sup>c</sup>    | 7.61 <sup>ab</sup>                          |                   |

<sup>a,b,c</sup>- LS-means with different superscripts within a column differ at  $p < 0.05$ ; TSL A = Pietrain x Large White, TSL B = pure Pietrain, TSL C = Pietrain x Duroc x Large White.

**Table S2.** Confidence intervals for incidence of boar taint in different meat samples.

| Entire Males    |            |            |            |            |            |            |            |            |            |
|-----------------|------------|------------|------------|------------|------------|------------|------------|------------|------------|
| Boar Taint      | None       |            |            | Strong     |            |            | Mild       |            |            |
|                 | A          | B          | C          | A          | B          | C          | A          | B          | C          |
| Heated, CI      | 0.67, 0.99 | 1.00, 1.00 | 0.83, 1.00 | 0.11, 0.44 | 0.00, 0.09 | 0.05, 0.27 | 0.00, 0.22 | 0.00, 0.09 | 0.00, 0.16 |
| Microwave, CI   | 0.55, 0.92 | 0.55, 0.93 | 0.72, 1.00 | 0.05, 0.42 | 0.11, 0.48 | 0.05, 0.35 | 0.00, 0.26 | 0.00, 0.21 | 0.00, 0.18 |
| Immunocastrates |            |            |            |            |            |            |            |            |            |
| Boar taint      | None       |            |            | Strong     |            |            | Mild       |            |            |
|                 | A          | B          | C          | A          | B          | C          | A          | B          | C          |
| Heated, CI      | 0.83, 1.00 | 0.83, 1.00 | 0.72, 1.00 | 0.05, 0.27 | 0.05, 0.27 | 0.05, 0.35 | 0.00, 0.16 | 0.00, 0.16 | 0.00, 0.18 |
| Microwave, CI   | 0.83, 1.00 | 0.39, 0.82 | 0.67, 0.99 | 0.05, 0.27 | 0.27, 0.70 | 0.05, 0.38 | 0.00, 0.16 | 0.00, 0.26 | 0.00, 0.27 |
